# 1 Founder effects arising from 2 gathering dynamics systematically 3 bias emerging pathogen surveillance

4 **Bradford P. Taylor<sup>1\*</sup> and William P. Hanage<sup>1</sup>**

\*For correspondence:

[bradfordptaylor@gmail.com](mailto:bradfordptaylor@gmail.com) (BPT)

5 <sup>1</sup>Center for Communicable Disease Dynamics, Department of Epidemiology, Harvard  
6 T.H. Chan School of Public Health, Boston, MA, USA

---

8 **Abstract** Models of infectious disease transmission have shown the importance of  
9 heterogeneous contact networks for epidemiology; the most connected individuals are most  
10 likely to be infected early. Yet it is cumbersome to parameterize and incorporate such networks  
11 into simple models. We introduce an alternative model framework that explicitly includes  
12 attendance at and disease transmission within gatherings of different sizes, which disaggregates  
13 sequential epidemics moving from the most to least social subpopulations that underly the  
14 overall, single-peaked infection curve. This can systematically bias initial estimates of the growth  
15 rate for emerging variants and their severity, if vulnerable populations avoid large gatherings.  
16 Finally, we show that how often similarly social individuals preferentially interact (i.e., homophily,  
17 or assortative mixing) tunes the magnitude and duration of these biases. Together, we provide a  
18 simple framework for incorporating socialization and behavior in epidemic models, which can  
19 help contextualize surveillance of emerging infectious agents.

---

## 21 Introduction

22 Directly transmitted infectious agents rely on the behavior of their hosts to start new infections and  
23 maintain themselves – specifically the contacts that their hosts make along which transmission may  
24 then occur. The contact networks that link individuals in a population are hence the routes along  
25 which communicable diseases spread, and considerable effort has been made to understand the  
26 nature of these networks and the implications for control of infectious agents (*Bansal et al., 2010*).  
27 The numbers of contacts individuals make can vary greatly, just as the nature of contacts can differ;  
28 some may be merely fleeting opportunities for a pathogen to initiate infection while others are  
29 sustained exposures to a large inoculum. Such heterogeneity in secondary contact rates appears  
30 to be common across epidemics, given over-dispersion of empirically observed secondary infection  
31 distributions, meaning that few individuals disproportionately contribute more towards ongoing  
32 transmission (*May and Anderson, 1987; Woolhouse et al., 1997; Lloyd-Smith et al., 2005; Stein,*  
33 *2011*). While some of this may be due to infections with unusual properties, those infectious must  
34 still make contacts in order to transmit to them (*Quinn et al., 2000; Fraser et al., 2007; Matthews*  
35 *et al., 2005; Lawley et al., 2008; Gopinath et al., 2012; Edwards et al., 2021*).

36 Another feature that contact networks exhibit is assortativity: the tendency for contacts to be  
37 made between nodes with similar properties (*Newman, 2002*). In social networks this is termed  
38 homophily, and in the case of communicable disease the consequence is that most transmission  
39 events take place among groups of similar individuals, which can be explicitly incorporated with  
40 a contact matrix (e.g., for age-structured models) (*McPherson et al., 2001; Rohani et al., 2010*).

41 Varying contact networks can be incorporated into dynamical models of transmission and have  
42 produced insights into subjects such as the optimal allocation of vaccines (those which prevent  
43 transmission are more effective when used in those with the most contacts) or the importance of  
44 core groups in maintaining sexually transmitted infections and as a focus of interventions (*Stigum*  
45 *et al., 1994; Endo et al., 2022*).

46 A special case of assortativity and homophily is when individuals share increased risks of expo-  
47 sure, and increased numbers of contacts – for example through gathering in groups of larger size.  
48 Larger gatherings both increase the chance that an infectious person attends, and the numbers to  
49 whom they may transmit (*Altizer et al., 2003; Godfrey et al., 2009; Chande et al., 2020*). The result-  
50 ing variations in risk of exposure may result from voluntary social interactions (and contact rates  
51 tend to be higher in younger people), but can also include sexual networks in which the majority  
52 of at-risk contacts occur between a small proportion of the population, or crowded settings such  
53 as workplaces in which employees are unable to mitigate their own risks of exposure (e.g., meat-  
54 packing plants in the early stages of the covid pandemic are a well-known case of workplaces in  
55 which large outbreaks occurred) (*Yorke et al., 1978; Volz and Meyers, 2007; Taylor et al., 2020*). In  
56 the context of an emerging pathogen or variant such transmission heterogeneity and homophily  
57 mean that any estimates from local surveillance efforts may not reflect the epidemic potential in  
58 other communities. The social context of disease spread can produce biases in surveillance given  
59 differences in resources between settings.

60 Mathematical models may be used to project the expected consequences of outbreaks. For ex-  
61 ample, in the classic SIR model for a directly transmitted pathogen the basic reproduction number  
62  $R_0$ , determines the final size of the epidemic, but the model makes well known unrealistic assump-  
63 tions about mixing patterns and must be extended to account for heterogeneity and homophily  
64 (*Kermack and McKendrick, 1927; Hébert-Dufresne et al., 2020*). Network models haven proven  
65 informative means to interrogate the effect of social structure on epidemic spread, yet by their  
66 nature they are demanding to parameterize (*Keeling and Eames, 2005; Keeling, 2005*). Nonethe-  
67 less, capturing these heterogeneous contacts is necessary to contextualize the rapid growth of an  
68 epidemic as a result of the social context where the outbreak arises, rather than specific proper-  
69 ties of the pathogen. This sort of "founder effect" is familiar in population genetics, but less so in  
70 epidemiology (*Mayr, 1942; Templeton, 2008*).

71 Here we present a simple extension of the classic SIR framework that specifically includes gath-  
72 ering sizes and homophily among individuals on the basis of the risk of infection. The resulting  
73 case curves are related to the gathering sizes and enable us to quantify how incorporating social-  
74 ization alters our expectations for early spread of emerging viruses and variants and how this is  
75 reflected in seroprevalence and genomic surveillance.

## 76 Results

### 77 Transmission at gatherings: Group-SIR model

78 We propose modifying SIR models to account for varying contact rates and risk by explicitly model-  
79 ing gathering dynamics using sampling processes. For any SIR-like model there are two key events,  
80 transmission and recovery, yielding infection dynamics:

$$\frac{dI}{dt} = \overbrace{B(S, I, R)}^{\text{transmission}} - \overbrace{\gamma I}^{\text{recovery}}$$

81 We focus on how gathering dynamics alter transmission,  $B(S, I, R)$  and ignore the effects of differ-  
82 ent recovery rates by normalizing time by the mean infectious period,  $\frac{1}{\gamma}$ . The rate gatherings occur,  
83  $r_{\text{gather}}$ , along with the size of the gatherings determine the social component of transmission that is  
84 controllable by non-pharmaceutical interventions. At a gathering, transmission can occur between  
85 each pair of the  $n$  attendees who were randomly sampled from the overall population. Figure 1a il-  
86 lustrates this sampling process for the classic SIR model where  $n=2$  and Figure 1b illustrates this for

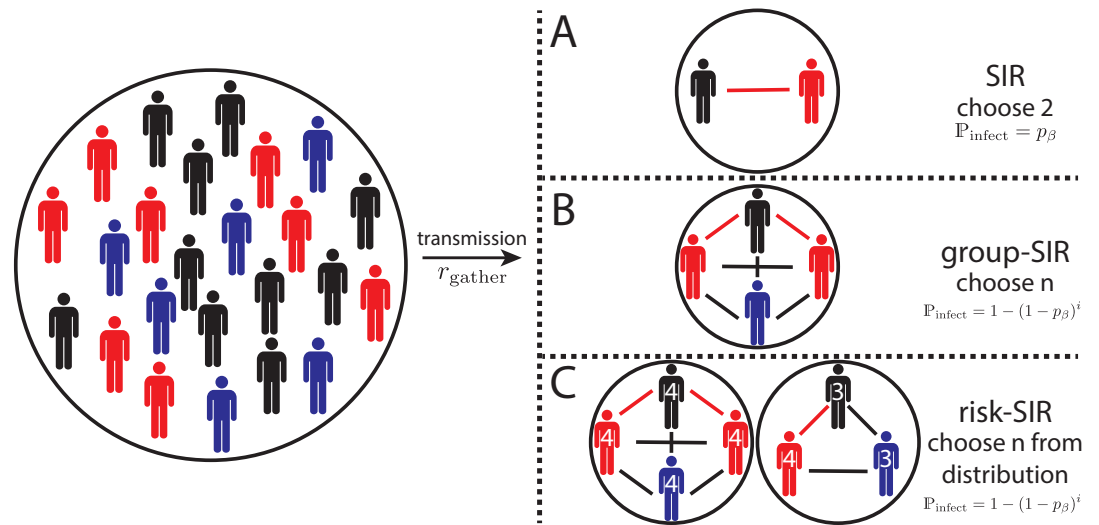

**Figure 1.** Schematic of sampling processes leading to different epidemic models described. A) The classic SIR model arises from sampling 2 individuals from a population of susceptible (black), infectious (red), and recovered (blue) individuals. B) Sampling  $n$  individuals yields a generalization of the SIR model, the group-SIR. Infections occur independently between each S-I pair present in a congregation. C) Denoting individuals by the maximum congregation size they are willing to attending yields the risk-SIR model. Societies can be defined by a distribution of congregation sizes which determine the epidemiological dynamics (Boyer *et al.*, 2022).

87 the generalized "group-SIR" model. The expected number of infections at a gathering determines  
88 the overall transmission rate:

$$B_{group}(n, S, I, R) = r_{gather} \mathbb{E}[\Delta I] = r_{gather} \sum_{(s,i,r)} s \mathbb{P}_{group}(s, i, r | S, I, R) \mathbb{P}_{infect}(i)$$

89 with probabilities

$$\mathbb{P}_{infect}(i) = 1 - (1 - p_{\beta})^i,$$

$$\mathbb{P}_{group}(s, i, r | S, I, R) = \frac{n!}{s!i!r!} \left(\frac{S}{N}\right)^s \left(\frac{I}{N}\right)^i \left(\frac{R}{N}\right)^r$$

90 where lower-case  $s$ ,  $i$ , and  $r$  denote the integer number of sampled susceptible, infectious, and  
91 recovered individuals attending the gathering and uppercase  $S$ ,  $I$ ,  $R$  denote the population-level  
92 densities such that  $S + I + R = N$ . To average, we sum over all possible combinations of  $n$  SIR  
93 attendees sampled from the population densities according to a multinomial distribution,  $\mathbb{P}_{group}$ .  
94 A susceptible is infected at the gathering with probability,  $\mathbb{P}_{infect}$  whenever any attending infectious  
95 individual transmits according to a pairwise probability of infection,  $p_{\beta}$ . The dynamics simplify to  
96 a classic SIR model when gatherings are restricted to pairs,  $n=2$ , whereas the transmission term  
97 becomes increasingly nonlinear for larger gatherings (see Appendix for details).

98 Increasing gathering sizes leads to sharper epidemics for otherwise fixed parameter values  
99 (Figure 2a). This is expected since increasing group sizes implicitly increases the total number of  
100 contacts relative to the recovery rate, i.e., increasing the basic reproduction number,  $R_0$ . Rescaling  
101 the transmission rate by the total number of pairwise interactions at a gathering,  $\binom{n}{2}$ , collapses the  
102 group-SIR dynamics onto each other (Figure 2a inset). There are fewer cases at the epidemic peak  
103 for larger gatherings as a result of multiple infectious individuals infecting the same susceptible,  
104 effectively reducing the number of pairwise interactions. In short, congregating in larger groups  
105 increases the rate of epidemic spread, but has minor impact on the dynamics when correcting for  
106 the number of interactions except by reducing the cumulative number of infections, in line with  
107 prior observations (Volz *et al.*, 2011).

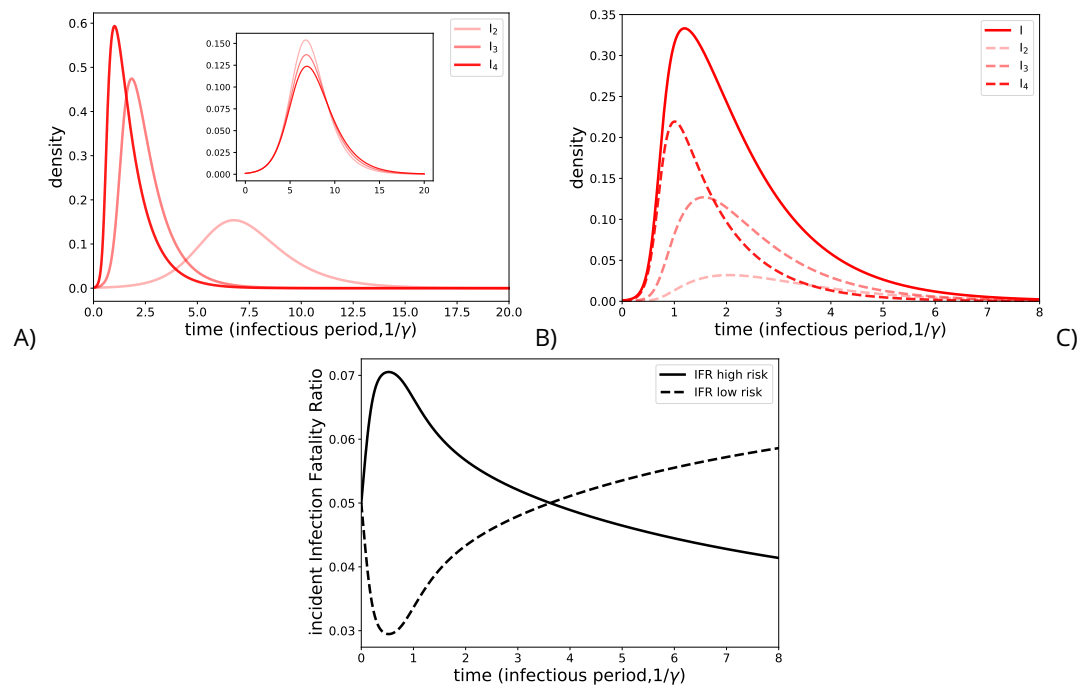

**Figure 2.** Generalized SIR dynamics. A) Group-SIR dynamics, where transmission occurs within groups with sizes here denoted by the subscript. B) Risk-SIR dynamics, where transmission occurs within groups according to a distribution here set with sizes  $n=2, 3$ , and  $4$  at equal frequency. Subpopulations are denoted by their risk level shown, which specifies the maximum gathering size they are willing to attend. C) The sequential peaks of infection cause the overall infection fatality ratio (IFR) to be dynamic when it varies between subpopulations. Here we compare IFR dynamics when the IFR is positively correlated with risk level (IFR high risk) and when the IFR is negatively correlated with risk level (IFR low risk). Note, we assume that mortality dynamics are the same as recovery dynamics to demonstrate this qualitative point.

108 **Gathering size dependent attendance: Risk-SIR model**

109 During infectious disease outbreaks individuals may vary in how much they alter their behavior in  
 110 response to perceived risk (*Perra et al., 2011; Eksin et al., 2017; Arthur et al., 2021; Harris et al.,*  
 111 *2023*). To capture this we can further generalize the group-SIR dynamics where individuals choose  
 112 among differently sized, concurrent gatherings and avoid those larger than their "risk level":

$$\frac{dI_k}{dt} = B_{\text{risk}}(k) - \gamma I_k$$

113 where risk levels are denoted by subscripts. Transmission follows from repeatedly sampling from  
 114 the population for a given distribution of differently sized gatherings,  $\mathbb{P}_n$ :

$$B_{\text{risk}}(k) = r_{\text{gather}} \sum_{n=2}^k \mathbb{P}_n B_{\text{group}}(n; S_k, \sum_{m \geq n} I_m, -S_k + \sum_{m \geq n} (R_m + S_m))$$

115 Each transmission term captures new infections within a particular focal subpopulation of indi-  
 116 viduals with the same risk level,  $k$ , such that only the respective susceptibles,  $S_k$ , contribute. These  
 117 focal susceptibles can be infected when attending any gathering no larger than their risk level,  $n \leq k$ ,  
 118 by any attending infectious individual with risk levels at least as large as the respective gathering  
 119 size,  $m \geq n$ . In contrast, infections among susceptibles from other subpopulations do not contribute  
 120 to new focal infections and thus they function similarly to the recovered population. Overall, the  
 121 transmission term is a weighted average over all gathering sizes according to a distribution,  $\mathbb{P}_n$ ,  
 122 set by society (e.g., by lockdowns) (*Boyer et al., 2022*). The risk-SIR model includes transmission  
 123 heterogeneity as subpopulations with higher risk level attend a larger fraction of gatherings, ho-  
 124 mophily as subpopulations with higher risk levels preferentially interact at larger gatherings, and  
 125 super-spreading as multiple infections can occur at large gatherings.

126 The risk-SIR yields single-peaked epidemics like the classical SIR, but with underlying sequen-  
 127 tial peaks among decreasing risk level subpopulations (Figure 2b). Differences in growth rates  
 128 cause these different peaks, namely that susceptibles in higher risk subpopulations attend larger  
 129 gatherings on top of attending the same gatherings at the same rate as those in lower risk subpop-  
 130 ulations. Similarly, infections in higher risk level subpopulations lead to more secondary infections.  
 131 The basic reproduction number of an infectious individual with a specified risk level,  $k$ , follows a  
 132 recurrence relation:

$$R_0(k) = R_0(k-1) + \frac{r_{\text{gather}}}{\gamma} \mathbb{P}_k p_{\beta}(k-1) \left( 1 - \left( 1 - \frac{1}{\sum_{m \geq k} N_m} \right)^k \right)$$

$$\approx R_0(k-1) + \frac{r_{\text{gather}}}{\gamma} \mathbb{P}_k p_{\beta} \frac{k(k-1)}{\sum_{m \geq k} N_m}$$

133 such that a disproportionate number of secondary infections occur at larger gatherings as enu-  
 134 merated by  $k$  (see Appendix for derivation). The largest fraction of the secondary infections occur  
 135 within the same risk subpopulation or in larger risk subpopulations as these susceptibles can at-  
 136 tend all the same gathering as those infectious, whereas susceptibles in smaller risk subpopulation  
 137 do not attend the larger gatherings. Together, these dynamics cause the initial growth of the epi-  
 138 demic to be driven by the largest risk subpopulations, in line with prior work (*May and Anderson,*  
 139 *1987*).

140 **Impact on Surveillance**

141 The sequential epidemic peaks within risk subpopulations have multiple impacts for disease surveil-  
 142 lance. First, the cases initially accumulate within subpopulations at most risk, highlighting the im-  
 143 portance of caution when interpreting and designing serosurveys to account for differential risk  
 144 of exposure. Any underlying surveillance metrics that vary between subpopulations will now be  
 145 dynamic. For example, we use infection fatality rates (IFR) to predict the threat of an emerging out-  
 146 break. If virulence depends on comorbidities that vary in frequency between each subpopulation

147 then the IFR will change over the successive peaks of the underlying outbreaks in different sub-  
148 populations. Figure 2c illustrates IFR dynamics for two general cases. First, when individuals with  
149 comorbidities choose to avoid larger gatherings, i.e., subpopulation IFR negatively correlates with  
150 risk level (IFR low risk), then the IFR increases over time because at risk populations are infected rel-  
151 atively more frequently at later times. This would also reduce case ascertainment at the outset of  
152 an epidemic, potentially biasing for lower estimates of  $R_0$ . Conversely, if individuals with comorbid-  
153 ities attend larger gatherings, i.e., subpopulation IFR positively correlates with risk level, then the  
154 IFR decreases over time (IFR high risk). This latter example is particular relevant for essential work-  
155 ers during lockdowns and communicable childhood diseases within school settings. IFR dynamics  
156 emphasize the danger in reporting aggregate statistics without accounting for disproportionate  
157 disease spread among subpopulations, such as when tracking emerging variants.

158 An epidemic grows at a rate determined by the socialization of all infectious individuals, i.e.,  
159 it's risk distribution. Meanwhile, a variant emerges within a subset of these infectious individu-  
160 als. Thus, even a neutral variant with no increased transmissibility relative to the background it  
161 emerges in is expected to increase in frequency if it is transmitted by individuals more social than  
162 average across the epidemic. Figure 3a shows the risk distribution of an epidemic and a neutral vari-  
163 ant emerging within the most social subpopulation at a given time. The resulting variant frequency  
164 dynamics, shown in Figure 3b, mimic logistic growth—approaching an equilibrium frequency prior  
165 to sweeping. This dynamic emphasizes the role that social context plays in determining the ob-  
166 served growth rate of a variant. For example, a variant of concern with increased transmissibility  
167 relative to wild type will ultimately grow in frequency, but if it emerges within a less social subpop-  
168 ulation then the observed increase in frequency will be delayed (figure 3c) increasing its chance  
169 to stochastically become extinct. The same plot with a logarithmic y-axis shows a clear decreases  
170 in frequency of the more transmissible variants that emerge in less social subpopulations, which  
171 increases the chance for stochastic extinction (See Appendix figure 1).

172 Since both increased transmissibility and increased contact opportunities contribute to the ap-  
173 parent fitness of a variant, identifying fast growing lineages during genomic surveillance imposes a  
174 selection bias towards identifying lineages preferentially spreading among more social individuals.  
175 To see this, we simulated the individual transmission and recovery events of a risk-SIR model us-  
176 ing the Gillespie algorithm and tracked all possible lineages (*Gillespie, 1977*). Figure 4a shows the  
177 frequency dynamics of the fastest growing lineage (having reached a given size at a given time - dot-  
178 ted vertical line). This lineage is neutral but appears to be growing more rapidly than its peers, and  
179 continues to increase in frequency after identification. This occurs because the risk distribution of  
180 the variant at the point of sampling, shown in Figure 4a (inset), contains relatively more social indi-  
181 viduals relative to the rest of the epidemic and, in turn, an expected increase in frequency relative  
182 to the epidemic. Note, here and throughout we follow common usage by epidemiologists to refer  
183 to pathogen clades as lineages, i.e., all ancestors of a focal case.

184 Whether identifying fastest growing lineage biases for those with spreading among more risky  
185 subpopulations depends on censusing parameters. This dependence arises because selecting  
186 fast-growing lineages biases the risk distributions by two opposing processes. On one hand fast-  
187 growing lineages are more likely to spread among the riskiest subpopulations because they attend  
188 more and larger gatherings and subsequently more frequent secondary infections. On the other  
189 hand, the fastest growing lineages preferentially include recent infections, which bias towards less  
190 risky populations given the sequential spread of the epidemic from more risky to less risky subpop-  
191 ulations over time. Figure 4b shows the the median risk distribution bias for different censusing  
192 parameters across 250 repeated simulations of an epidemic spreading within a society with high  
193 variance in gathering rates (see caption). The x-axis specifies the minimum frequency within a 100%  
194 bandwidth that the fastest growing lineage will be tracked, e.g., 0.01 refers to the fastest growing  
195 lineage among those between .01 and .02 frequency. Fast growing lineages tend to have biased  
196 risk distribution particularly early on during epidemics, in line with greater stochastic deviations  
197 of smaller lineages for a given frequency. Figure 4c shows whether the identified lineages tend to

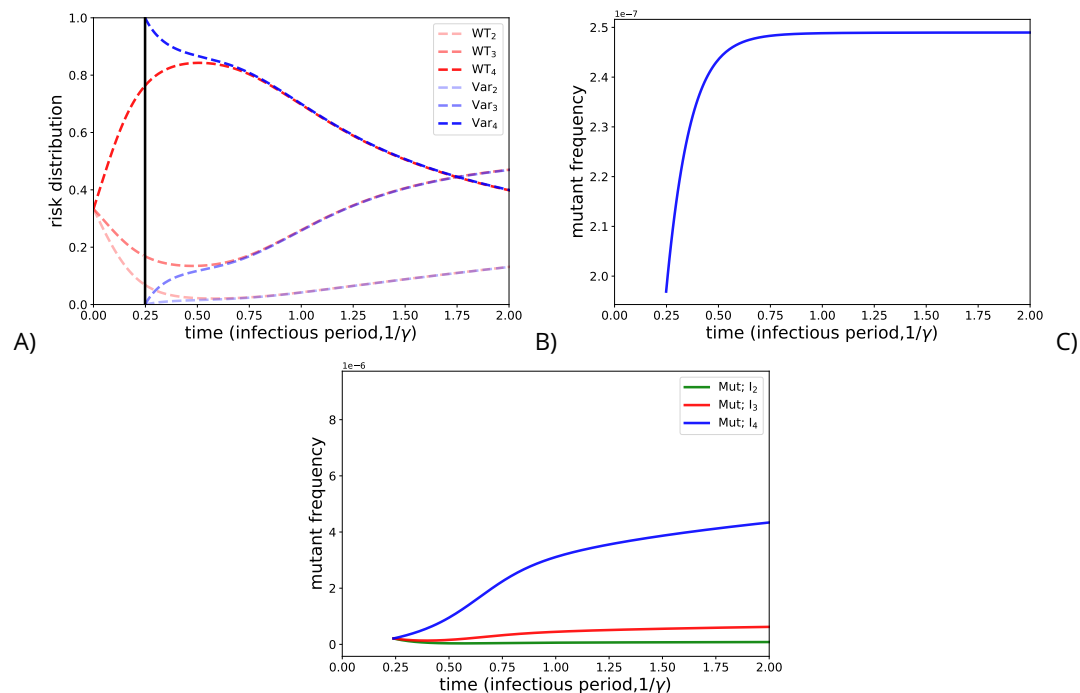

**Figure 3.** Variant frequency dynamics depend on which risk subpopulation it emerges within. A) Risk distribution of an epidemic (red) and a neutral variant (blue) that emerges within the highest risk subpopulation. B) The associated frequency dynamics of the emerging neutral variant. C) Frequency dynamics of a variant with 50% greater transmissibility relative to the background epidemic emerging in different risk subpopulations

198 grow over time due to the bias for different censusing parameters. We see that the long-term ef-  
 199 fect of the bias is larger for moderate frequencies (.04 vs .01), due to the fact that larger lineages for  
 200 a given frequency take longer to deterministically relax their risk distribution to that of the entire  
 201 epidemic. Note, given the impact of this bias is larger for moderately sized fast-growing lineages  
 202 means we are susceptible to identifying these lineages during surveillance. For example, the CDC  
 203 tracks lineages > .01 frequency. Our above results suggest these lineages are susceptible to being  
 204 misidentified as having increased transmissibility and that their continued transient increase in fre-  
 205 quency following censusing would incorrectly solidify these concerns. By understanding how social  
 206 structure modulates these biases, we can better establish from which communities we expect to  
 207 identify these spurious variants of concern.

### 208 Society modulated surveillance bias

209 Who interacts with whom in a society affects the magnitude of the above identified surveillance bi-  
 210 ases. For example, the amount of homophily, i.e., assortative mixing, within a community sets the  
 211 time scale over which such lineages will continue to spuriously increase in frequency. Intuitively,  
 212 homophily increases the probability a skewed risk distribution remains skewed as onward infec-  
 213 tions primarily occur within riskier subpopulation. As the risk-SIR model has a fixed social structure  
 214 and homophily, we can better understand the relationship between homophily and skewed risk  
 215 distribution retention by analyzing a simplified SIR type model that disentangles transmission het-  
 216 erogeneity and homophily:

$$\frac{dI_H}{dt} = S_H(\beta_{HH}I_H + \beta_{HL}I_L) - \gamma I_H$$

$$\frac{dI_L}{dt} = S_H(\beta_{HL}I_H + \beta_{LL}I_L) - \gamma I_L$$



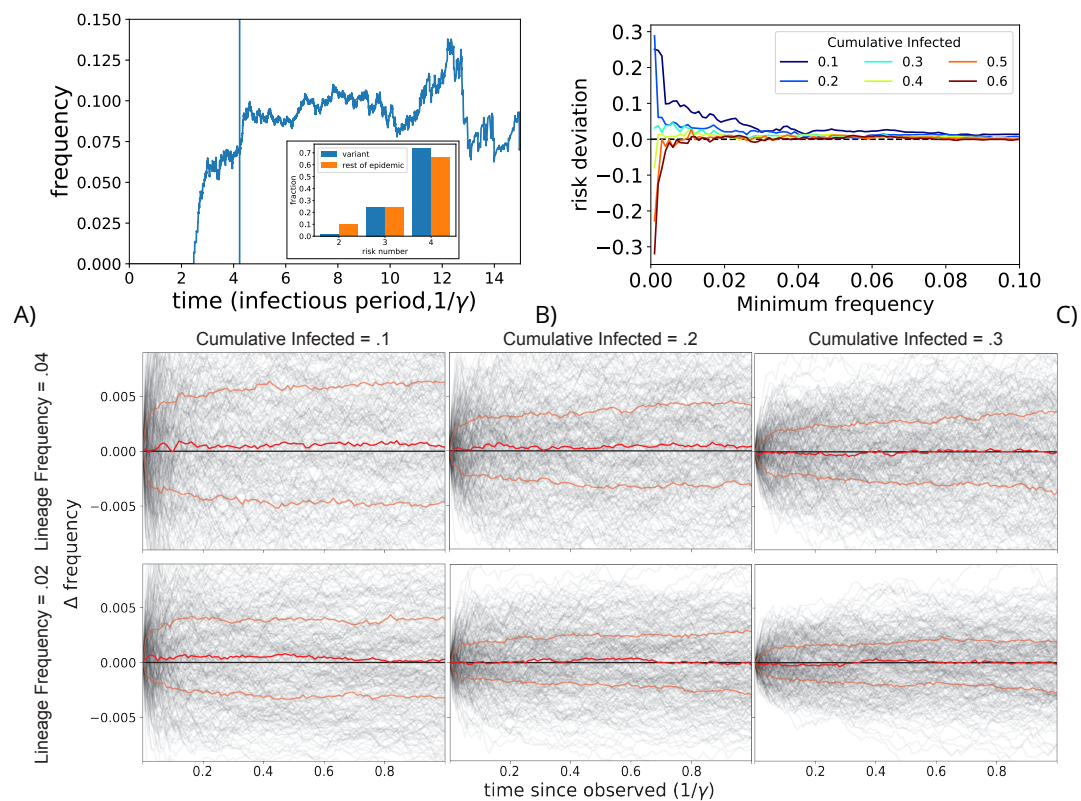

**Figure 4.** Selection bias of fast growing clades a) An example of a fast growing clade that continues to grow beyond the point it was identified (blue vertical line) and its risk distribution among infectious individuals as compared to all others infectious at the moment of censusing (inset). b) Median difference between the median of the fastest growing risk distribution and the risk distribution of the rest of the epidemic for given censusing frequency within a 100% bandwidth for epidemics with subpopulations [5000, 0, 5000, 0, 5000] for risk numbers 2-6. c) Relative frequency dynamics of the fastest growing lineages following censusing across different censusing parameters for epidemics with subpopulations [5000, 0, 5000, 0, 5000] for risk numbers 2-6. Red lines denote median and interquartile ranges across 250 simulations shown in transparent black lines.



217 where  $H$  denotes highly social individuals and  $L$  denotes less social individuals. This is a minimal model including transmission heterogeneity when the subpopulations differ in their basic reproduction number, i.e.,  $R_{0,H} = \frac{\beta_{HH}S_H + \beta_{LH}S_L}{\gamma} > \frac{\beta_{LL}S_L + \beta_{LH}S_H}{\gamma} = R_{0,L}$ , while smaller values of cross-transmission,  $\beta_{HL}$ , correspond to societies with greater homophily. For this model, the risk distribution simplifies to the relative fraction of the more social subpopulation  $f_H = \frac{I_H}{I_H + I_L}$ . We can solve for the equilibrium risk distribution,  $f_H^*$ , early on in an epidemic during exponential growth by fixing the susceptibles ( $S_H$  and  $S_L$ ) to constants and solving the respective dynamics,  $\frac{df_H}{dt} = 0$ . The equilibrium risk distribution depends on the structure of society, with increasing homophily reflected as a higher proportion of highly social individuals (see Appendix figure 2).

226 Randomness in individual transmission and recovery events (i.e., demographic stochasticity) causes the risk distribution to drift, even when at equilibrium. We can solve for the dynamics of the probability distribution over risk distributions as induced by demographic stochasticity via a so-called "master equation" parametrized by the average rates of the individual events (*van Kampen, 2007*). Figure 5a shows probability distributions after 500 population changes (transmission or recovery) for epidemics varying in homophily and initiated with 20 infectious individuals distributed according to their respective equilibrium risk distribution. Note, we vary homophily alone and keep the same levels of transmission heterogeneity across models by fixing the subpopulation basic reproduction numbers,  $R_{0,H}$  and  $R_{0,L}$ . Demographic stochasticity induces a spread that eventually dissipates over time (see Appendix figure 3). This means emerging variants are likely to deviate further from the equilibrium growth rate than the rest of the epidemic. This motivates quantifying how often a variant will grow faster versus slower than the equilibrium growth rate,  $\rho = \frac{\mathbb{P}(f_H > f_H^*)}{\mathbb{P}(f_H > f_H^*) + \mathbb{P}(f_H < f_H^*)}$ . Figure 5b compares the relative probability of increased sociality,  $\rho$ , dynamics after initiating infectious populations at their respective equilibrium value,  $f_H^*$ , for different amounts of homophily. Emerging variants in societies with increased homophily have larger bias towards increased growth rates relative to the overall epidemic. Figure 5c shows the bias in risk distribution for epidemics initiating either in the more social ( $I_H$ , dashed lines) or the less social ( $I_L$ , solid lines) subpopulations. The subpopulation in which a variant emerges sets an initial risk distribution bias and societies with increased homophily retain this bias longer. However, the risk distribution bias ultimately approaches the same biased quasi-equilibrium value as seen above when started at the equilibrium.

247 Preferential stochastic extinction of slower growing epidemics exacerbates the growth bias induced by homophily. An epidemic goes stochastically extinct when its last remaining infectious individual recovers prior to onwards transmission. Intuitively, epidemics are more likely to go stochastically extinct when the last remaining infectious individual is among a less social subpopulation. This further increases the growth bias beyond that induced by homophily alone (see Appendix Figure 4). Hence, we expect emerging variants to increase in frequency by preferentially spreading among more social individuals, particularly when they emerge in societies with high levels of homophily.

## 255 Discussion

256 The dynamics of communicable diseases are intimately linked to the contacts that are made between their hosts (*Buckee et al., 2021*). These are the opportunities to transmit and initiate new infections, and must be accounted for if we wish to interpret recent data during the course of an outbreak or forecast its course. Here we have presented a simple and flexible means to incorporate network structure implicitly into the classic SIR-framework and relate it to varying risks of exposure. By allowing interactions within groups of size  $> 2$ , representing varying risk-groups as a result of choice or necessity, the dynamics can no longer be described simply as the product of the proportions of the population that are susceptible or infectious, allowing us to examine the dynamics in separate risk groups and the impact on individual chains of transmission within them.

265 Prior studies on how contact heterogeneity impacts disease spread has been a major contrib-

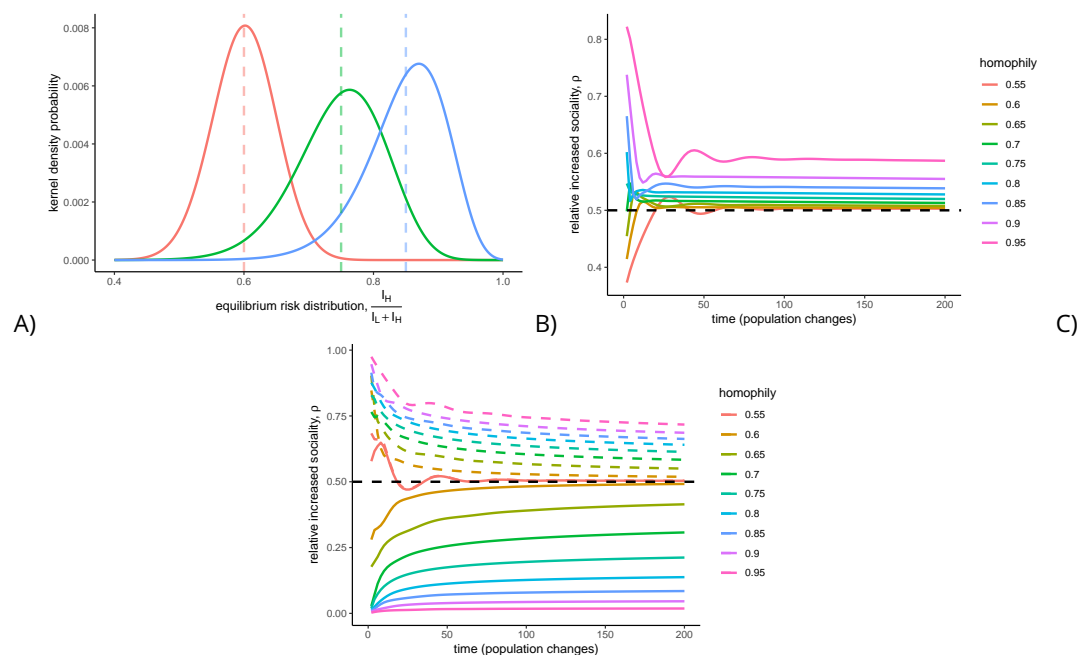

**Figure 5.** Homophily biases risk distributions a) Smoothed probability distributions of the risk distribution of epidemics initiated with 20 individuals at the respective equilibrium distribution after 500 population changes (total recovery or transmission events). Vertical dashed lines specify respective equilibrium risk distributions. B) Relative probability of a more social risk distribution ( $f_H > f_H^*$ ) than a less social risk distribution ( $f_H < f_H^*$ ) for epidemics initiated with 20 infectious individuals distributed according to the equilibrium risk distribution ( $f_H^*$ ) denoted as homophily. C) Relative probability of a more social risk distribution ( $f_H > f_H^*$ ) than a less social risk distribution ( $f_H < f_H^*$ ) for epidemics initiated with 1 infectious individuals either in the more social subpopulation (dashed lines) or the less social subpopulation (solid lines).

266 utor to the epidemiology of HIV-1 among at-risk populations, and more recently Mpox transmis-  
267 sion along dense contact networks among men who have sex with men (*May and Anderson, 1987*;  
268 *Endo et al., 2022*). This includes sequential spread to populations with low contact rates from ‘core  
269 groups’ characterized by higher numbers of contacts (*Yorke et al., 1978*; *Colgate et al., 1989*). Our  
270 work explicitly includes gatherings as a mechanism for the separation of and homophily between  
271 high and low contact subpopulations. This context is more relevant for pathogens with shorter  
272 latency time than HIV including respiratory viruses like SARS-CoV-2 in which super-spreading (i.e.,  
273 overdispersed transmission) plays a large role in the observed dynamics – especially at the out-  
274 set as the pathogen is introduced and becomes established. By emphasizing the importance of  
275 gatherings as the locus of spread, our model is aligned with interventions that utilize retrospective  
276 contact tracing to enable epidemiologists to monitor key locations where transmission occurs and  
277 link these data to population-level predictions (*Boyer et al., 2022*).

278 In an unmitigated outbreak, the only factor reducing the rate of new infections is convalescent  
279 immunity, and it has been recognized for some time that variable contact rates can have a large  
280 impact on the point at which this begins to take effect (*Hébert-Dufresne et al., 2020*). This is im-  
281 portant for vaccination strategies aimed at those most likely to become infected and transmit, as  
282 it can markedly reduce the ‘herd immunity threshold’ necessary to achieve control and prevent  
283 large outbreaks (*Woolhouse et al., 1997*). Our model readily captures this and shows moreover  
284 that a single outbreak is itself made up of multiple ones with different dynamics in distinct but  
285 overlapping networks with distinct but overlapping epidemic curves. Those with the most contacts  
286 are rapidly infected, leading to the counterintuitive result that those who make the fewest contacts  
287 and/or have the fewest risks of exposure are more likely to be infected at times when the force  
288 of infection is lower, particularly late in the epidemic. This finding is important when interpreting  
289 the relationship between crude case counts and severe outcomes, where the latter vary markedly  
290 among individuals. It is illustrated by the use of hospitalizations and deaths as a lagging indicator  
291 of cases early in the COVID-19 pandemic, and likely contributes to the much smaller variance in  
292 numbers of severe outcomes over time as compared with estimates of case counts or wastewater  
293 data (*Khan et al., 2023*). Intuitively, those who are most vulnerable are least likely to be infected  
294 early on, but they and their networks will remain capable of supporting a sustained outbreak over  
295 a longer period of the epidemic.

296 This can also produce substantial bias in the apparent value of key parameters that are impor-  
297 tant for forecasting and estimating the impacts of an outbreak. If there is any correlation between  
298 the risk groups and the probability of severe illness, quantities such as the infection fatality rate or  
299 infection hospitalization rate will be biased. And this bias is in addition to those already known to  
300 arise through under-ascertainment of mild infections (*Accorsi et al., 2021*).

301 The model also suggests caution when interpreting and estimating the fitness of emerging lin-  
302 eages such as putative ‘variants of concern’. The founder effect in population genetics refers to  
303 a spurious appearance of fitness as a result of stochastic factors, as when a small number of mi-  
304 grating individuals colonizes a deserted island (*Wright, 1942*). Here, it indicates that early on in  
305 an epidemic the initial growth rate of any lineage that becomes common enough to be noticed  
306 is expected to be biased upward in relation to its true fitness, simply because it is spreading by  
307 definition in the networks which make the most contacts. Conversely, as the overall epidemic is  
308 declining those lineages that are persisting are infecting a higher proportion of fewer contacts, and  
309 so past the peak increases in proportion of a sample becomes a more reliable indicator of fitness.

310 Because we have developed an extension of the SIR model, we have not explicitly considered  
311 immune evasion. However it can readily be seen that the host population in which a pathogen  
312 with immune evasion is most likely to experience both high fitness and start spreading is that  
313 which makes the most contacts and within which seroprevalence is highest (*Bushman et al., 2021*).  
314 Although this may be complicated by the timescale of waning immunity this is beyond the scope  
315 of the present work.

316 The SIR model has been a valuable source of intuition for generations of epidemiologists but is

317 known to be limited. Here we have shown the value of a small change to incorporate larger group  
318 sizes than pairwise interactions. The results help interpret the expected course of epidemics where  
319 socialization and awareness of the epidemic drive transmission, such as during the recent Mpox  
320 outbreak (*Endo et al., 2022*). Furthermore, our model highlights how varying exposure leads to  
321 under-appreciated sources of bias when tracking putative variants of concern. Overall, the sim-  
322 plicity of the model may allow it to be readily applied to more complicated scenarios in which risk  
323 perception varies over time and the relative compositions of risk groups change accordingly.

### 324 **Code availability**

325 All code used to generate the figures is available at: [https://github.com/bradfordptaylor/risk\\_sir](https://github.com/bradfordptaylor/risk_sir).

### 326 **Acknowledgements**

327 This project has been funded (in part) by contract 200-2016-91779 with the Centers for Disease  
328 Control and Prevention and by contract U01 CA261277 through SeroNet. Disclaimer: The findings,  
329 conclusions, and views expressed are those of the author(s) and do not necessarily represent the  
330 official position of the Centers for Disease Control and Prevention (CDC).

### 331 **References**

- 332 **Accorsi EK**, Qiu X, Rumpler E, Kennedy-Shaffer L, Kahn R, Joshi K, Goldstein E, Stensrud MJ, Niehus R, Cevik M,  
333 Lipsitch M. How to detect and reduce potential sources of biases in studies of SARS-CoV-2 and COVID-19.  
334 *European Journal of Epidemiology*. 2021 2; 36(2):179–196.
- 335 **Altizer S**, Nunn CL, Thrall PH, Gittleman JL, Antonovics J, Cunningham AA, Dobson AP, Ezenwa V, Jones KE,  
336 Pedersen AB, Poss M, Pulliam JRC. Social Organization and Parasite Risk in Mammals: Integrating Theory  
337 and Empirical Studies. *Annual Review of Ecology, Evolution, and Systematics*. 2003 11; 34(1):517–547.
- 338 **Arthur RF**, Jones JH, Bonds MH, Ram Y, Feldman MW. Adaptive social contact rates induce complex dynamics  
339 during epidemics. *PLOS Computational Biology*. 2021 feb 10; 17(2):e1008639.
- 340 **Bansal S**, Read J, Pourbohloul B, Meyers LA. The dynamic nature of contact networks in infectious disease  
341 epidemiology. *Journal of Biological Dynamics*. 2010 9; 4(5):478–489.
- 342 **Boyer CB**, Rumpler E, Kissler SM, Lipsitch M. Infectious disease dynamics and restrictions on social gathering  
343 size. *Epidemics*. 2022 9; 40:100620.
- 344 **Buckee C**, Noor A, Sattenspiel L. Thinking clearly about social aspects of infectious disease transmission. *Nature*.  
345 2021 jun 30; 595(7866):205–213.
- 346 **Bushman M**, Kahn R, Taylor BP, Lipsitch M, Hanage WP. Population impact of SARS-CoV-2 variants with en-  
347 hanced transmissibility and/or partial immune escape. *Cell*. 2021 12; 184(26):6229–6242.e18.
- 348 **Chande A**, Lee S, Harris M, Nguyen Q, Beckett SJ, Hilley T, Andris C, Weitz JS. Real-time, interactive website for  
349 US-county-level COVID-19 event risk assessment. *Nature Human Behaviour*. 2020 nov 9; 4(12):1313–1319.
- 350 **Colgate SA**, Stanley EA, Hyman JM, Layne SP, Qualls C. Risk behavior-based model of the cubic growth of ac-  
351 quired immunodeficiency syndrome in the United States. *Proceedings of the National Academy of Sciences*.  
352 1989; 86(12):4793–4797.
- 353 **Edwards DA**, Ausiello D, Salzman J, Devlin T, Langer R, Beddingfield BJ, Fears AC, Doyle-Meyers LA, Redmann  
354 RK, Killeen SZ, Maness NJ, Roy CJ. Exhaled aerosol increases with COVID-19 infection, age, and obesity. *Pro-  
355 ceedings of the National Academy of Sciences*. 2021 feb 9; 118(8).
- 356 **Eksin C**, Shamma JS, Weitz JS. Disease dynamics in a stochastic network game: a little empathy goes a long way  
357 in averting outbreaks. *Scientific Reports*. 2017 mar 14; 7(1).
- 358 **Endo A**, Murayama H, Abbott S, Ratnayake R, Pearson CAB, Edmunds WJ, Fearon E, Funk S. Heavy-tailed  
359 sexual contact networks and monkeypox epidemiology in the global outbreak, 2022. *Science*. 2022 oct 7;  
360 378(6615):90–94.

- 361 **Fraser C**, Hollingsworth TD, Chapman R, de Wolf F, Hanage WP. Variation in HIV-1 set-point viral load: Epidemiological analysis and an evolutionary hypothesis. *Proceedings of the National Academy of Sciences*. 2007 oct 30; 104(44):17441–17446.
- 362  
363
- 364 **Gillespie DT**. Exact stochastic simulation of coupled chemical reactions. *The Journal of Physical Chemistry*. 1977 12; 81(25):2340–2361.
- 365
- 366 **Godfrey SS**, Bull CM, James R, Murray K. Network structure and parasite transmission in a group living lizard, the gidgee skink, *Egernia stokesii*. *Behavioral Ecology and Sociobiology*. 2009 apr 2; 63(7):1045–1056.
- 367
- 368 **Gopinath S**, Carden S, Monack D. Shedding light on *Salmonella* carriers. *Trends in Microbiology*. 2012 7; 20(7):320–327.
- 369
- 370 **Harris MJ**, Cardenas KJ, Mordecai EA. Social divisions and risk perception drive divergent epidemics and large later waves. *Evolutionary Human Sciences*. 2023; 5.
- 371
- 372 **Hébert-Dufresne L**, Althouse BM, Scarpino SV, Allard A. Beyond  $R_0$ : heterogeneity in secondary infections and probabilistic epidemic forecasting. *Journal of The Royal Society Interface*. 2020 11; 17(172):20200393.
- 373
- 374 **van Kampen NG**. *Stochastic Processes in Physics and Chemistry (Third Edition)*. Elsevier; 2007.
- 375 **Keeling M**. The implications of network structure for epidemic dynamics. *Theoretical Population Biology*. 2005 2; 67(1):1–8.
- 376
- 377 **Keeling MJ**, Eames KTD. Networks and epidemic models. *Journal of The Royal Society Interface*. 2005 jun 20; 2(4):295–307.
- 378
- 379 **Kermack WO**, McKendrick AG. A contribution to the mathematical theory of epidemics. *Proceedings of the Royal Society of London Series A, Containing Papers of a Mathematical and Physical Character*. 1927 8; 115(772):700–721.
- 380  
381
- 382 **Khan D**, Park M, Burkholder J, Dumbuya S, Ritchey MD, Yoon P, Galante A, Duva JL, Freeman J, Duck W, Soroka S, Bottichio L, Wellman M, Lerma S, Lyons BC, Dee D, Haile S, Gaughan DM, Langer A, Gundlapalli AV, et al. Tracking COVID-19 in the United States With Surveillance of Aggregate Cases and Deaths. *Public Health Reports*. 2023 mar 24; 138(3):428–437.
- 383  
384  
385
- 386 **Lawley TD**, Bouley DM, Hoy YE, Gerke C, Relman DA, Monack DM. Host Transmission of *Salmonella enterica* Serovar Typhimurium Is Controlled by Virulence Factors and Indigenous Intestinal Microbiota. *Infection and Immunity*. 2008 1; 76(1):403–416.
- 387  
388
- 389 **Lloyd-Smith JO**, Schreiber SJ, Kopp PE, Getz WM. Superspreading and the effect of individual variation on disease emergence. *Nature*. 2005; 438(7066):355–359.
- 390
- 391 **Matthews L**, McKendrick IJ, Terner H, Gunn GJ, Synge B, Woolhouse MEJ. Super-shedding cattle and the transmission dynamics of *Escherichia coli* O157. *Epidemiology and Infection*. 2005 jun 3; 134(1):131–142.
- 392
- 393 **May RM**, Anderson RM. Transmission dynamics of HIV infection. *Nature*. 1987 mar 1; 326(6109):137–142.
- 394
- 395 **McPherson M**, Smith-Lovin L, Cook JM. Birds of a Feather: Homophily in Social Networks. *Annual Review of Sociology*. 2001 8; 27(1):415–444.
- 396
- 397 **Newman MEJ**. Assortative Mixing in Networks. *Physical Review Letters*. 2002 oct 28; 89(20).
- 398
- 399 **Perra N**, Balcan D, Gonçalves B, Vespignani A. Towards a Characterization of Behavior-Disease Models. *PLoS ONE*. 2011 aug 3; 6(8):e23084.
- 400
- 401 **Quinn TC**, Wawer MJ, Sewankambo N, Serwadda D, Li C, Wabwire-Mangen F, Meehan MO, Lutalo T, Gray RH. Viral Load and Heterosexual Transmission of Human Immunodeficiency Virus Type 1. *New England Journal of Medicine*. 2000 mar 30; 342(13):921–929.
- 402
- 403 **Rohani P**, Zhong X, King AA. Contact Network Structure Explains the Changing Epidemiology of Pertussis. *Science*. 2010 nov 12; 330(6006):982–985.
- 404
- 405 **Stein RA**. Super-spreaders in infectious diseases. *International Journal of Infectious Diseases*. 2011 8; 15(8):e510–e513.
- 406

- 407 **Stigum H**, Falck W, Magnus P. The core group revisited: The effect of partner mixing and migration on the  
408 spread of gonorrhoea, chlamydia, and HIV. *Mathematical Biosciences*. 1994 3; 120(1):1–23.
- 409 **Taylor CA**, Boulos C, Almond D. Livestock plants and COVID-19 transmission. *Proceedings of the National  
410 Academy of Sciences*. 2020 nov 19; 117(50):31706–31715.
- 411 **Templeton AR**. The reality and importance of founder speciation in evolution. *BioEssays*. 2008; 30(5):470–479.
- 412 **Volz E**, Meyers LA. Susceptible–infected–recovered epidemics in dynamic contact networks. *Proceedings of  
413 the Royal Society B: Biological Sciences*. 2007 sep 18; 274(1628):2925–2934.
- 414 **Volz EM**, Miller JC, Galvani A, Ancel Meyers L. Effects of Heterogeneous and Clustered Contact Patterns on  
415 Infectious Disease Dynamics. *PLoS Computational Biology*. 2011 jun 2; 7(6):e1002042.
- 416 **Woolhouse ME**, Dye C, Etard JF, Smith T, Charlwood J, Garnett G, Hagan P, Hii J, Ndhlovu P, Quinnell R, et al.  
417 Heterogeneities in the transmission of infectious agents: implications for the design of control programs.  
418 *Proceedings of the National Academy of Sciences*. 1997; 94(1):338–342.
- 419 **Wright S**. Statistical genetics and evolution. *Bulletin of the American Mathematical Society*. 1942 April;  
420 48(4):223–246.
- 421 **Yorke JA**, Hethcote HW, Nold A. Dynamics and Control of the Transmission of Gonorrhoea. *Sexually Transmitted  
422 Diseases*. 1978 4; 5(2):51–56.



## 423 Appendix 1

### 424 $n = 2$ and $n = 3$ group-SIR transmission terms

425 Here, we expand the group-SIR transmission term to connect it to the classic SIR model  
 426 and to show how transmission grows nonlinearly with increasing group size. The sampling  
 427 process yields transmission rates proportional to the expected number of infections at gathering  
 428 with a given size  $n$ :

$$429 B_{\text{group}}(n, S, I, R) \propto \mathbb{E}_{\Delta I}(n) = \sum_{(s,i,r)} s P_{\text{group}}(s, i, r | S, I, R) P_{\text{infect}}(i)$$

432 with probabilities

$$433 P_{\text{infect}}(i) = 1 - (1 - p_{\beta})^i,$$

$$434 P_{\text{group}}(s, i, r | S, I, R) = \frac{n!}{s!i!r!} \left(\frac{S}{N}\right)^s \left(\frac{I}{N}\right)^i \left(\frac{R}{N}\right)^r$$

437 Transmission only occurs at gatherings when at least one infected and at least one suscep-  
 438 tible attend. Hence, only one combination of attendees contributes in the  $n = 2$  case:

$$441 B_{\text{group}}(2, S, I, R) \propto 1 \times \mathbb{P}(s = 1, i = 1, r = 0 | S, I, R) (1 - (1 - p_{\beta})^1) = 2p_{\beta} \frac{S}{N} \frac{I}{N}$$

442 which is proportional to the bilinear classic SIR model. Note, the emphasis on propor-  
 443 tionality, as this from differs from standard presentation of the SIR transmission by a con-  
 444 stant factor of  $\frac{1}{N}$  which can be accounted for by the rate of gathering  $r_{\text{gather}}$ . The  $n = 3$  case  
 445 includes transmission with more combinations of  $s, i,$  and  $r$  attendees:  
 446

$$447 B_{\text{group}}(3, S, I, R) \propto (1 - (1 - p_{\beta})^1) [\mathbb{P}(s = 1, i = 1, r = 1 | S, I, R) + 2\mathbb{P}(s = 2, i = 1, r = 0 | S, I, R)] +$$

$$448 (1 - (1 - p_{\beta})^2) \mathbb{P}(s = 1, i = 2, r = 0 | S, I, R) =$$

$$449 p_{\beta} \left[ 6 \left(\frac{S}{N}\right) \left(\frac{I}{N}\right) \left(\frac{R}{N}\right) + 2 \times 3 \left(\frac{S}{N}\right)^2 \left(\frac{I}{N}\right) \right] +$$

$$450 p_{\beta}(2 + p_{\beta}) \left[ 3 \left(\frac{S}{N}\right) \left(\frac{I}{N}\right)^2 \right]$$

451 which deviates from a classical SIR model due to higher order nonlinearity.

### 452 risk-SIR $R_0$ derivation

The basic reproduction number,  $R_0$ , is defined as the average number of secondary infec-  
 tions transmitted by an index case in an otherwise uninfected population. This can be cal-  
 culated from the dynamics of gathering and the expected number of infections given the  
 combinatorics of attendance. Because individuals with different risk levels attend different  
 gatherings, we calculate the basic reproduction number for each risk subpopulation. Three  
 terms contribute to  $R_0(k)$ : (1) the total number of gatherings at given sizes that an individual  
 with risk level  $k$  can attend while infectious, (2) the probability that the individual attends  
 each gathering, and (3) the average number of infections at each gathering given the infec-  
 tious individual attends. The average number of gatherings for a given size  $n \leq k$  that occur  
 during the average infectious period is:

$$N_{\text{gather}}(n) = \frac{r_{\text{gather}}}{\gamma} P_n$$

464  
465  
466  
467  
468  
469  
470  
471  
472  
473  
474  
475  
476  
477  
478  
479  
480  
481  
482  
483  
484  
485  
486

where  $r_{gather}$  is the rate all gatherings occur,  $\gamma$  is the recovery rate, and  $\mathbb{P}_n$  is the probability a gathering is size  $n$ . The probability an individual with risk level  $\geq n$  attends a gathering of size  $n$  is:

$$\mathbb{P}_{attend}(n) = 1 - \left( 1 - \prod_{j=1}^n \frac{\sum_{m \geq n} N_m - j - 1 + 1}{\sum_{m \geq n} N_m - j + 1} \right)$$

which is the complement of the probability an infectious individual not being sampled as any of the  $n$  attendees from the total individuals with sufficiently high risk levels,  $N_m$ . The expected number of infections at a gathering of size  $n$  when the infectious individual attends is simply:

$$\mathbb{E}_{\Delta I}(n) = (n - 1)p_{beta}$$

where  $p_{beta}$  is the pairwise infection probability. We combine these terms, sum over all possible gathering sizes that the infectious individual with risk level  $k$  is willing to attend, and simplify  $\mathbb{P}_{attend}$  in the limit of infinite population sizes,  $N \rightarrow \infty$ , to get the final result:

$$\text{risk: } R_0(k) = \sum_{n=2}^k N_{gather}(n) \mathbb{E}_{\Delta I}(n) \mathbb{P}_{attend}(n) = \frac{r_{gather}}{\gamma} \sum_{n=2}^k \mathbb{P}_n \frac{p_{beta}(n-1)n}{\sum_{m \geq n} N_m}$$

We show this result as a recurrence relation in the text to highlight how it scales with  $k$ .

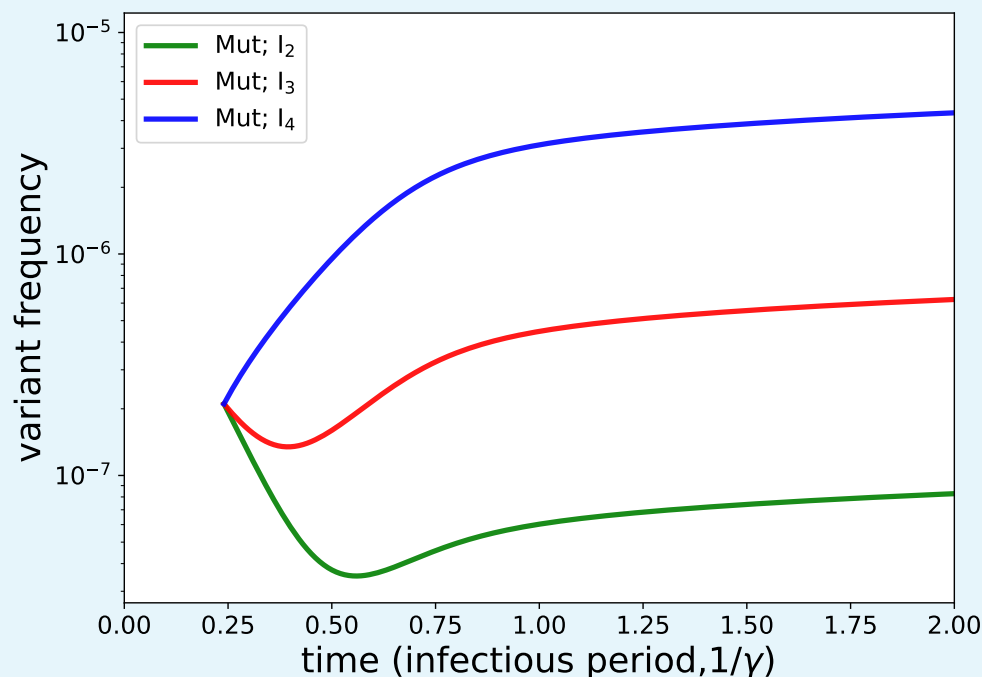

487  
488  
489

**Appendix 1—figure 1.** Dynamics of a variant with increased transmissibility relative to wildtype emerging in different risk subpopulations.

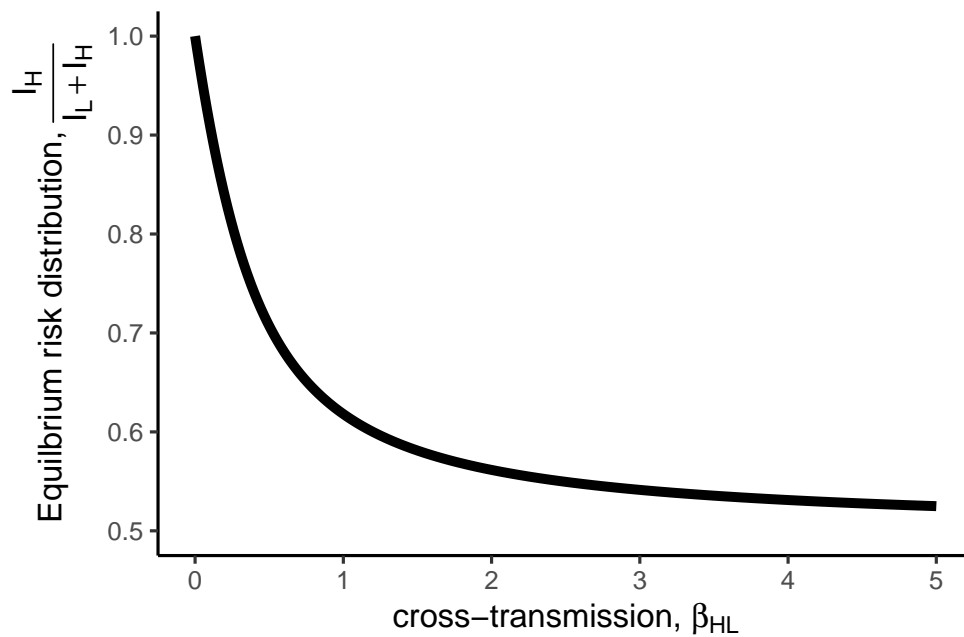

491  
492  
493  
495

**Appendix 1—figure 2.** Equilibrium risk distribution for exponentially growing epidemics in societies with transmission heterogeneity as the amount of cross transmission between two subpopulation varies.

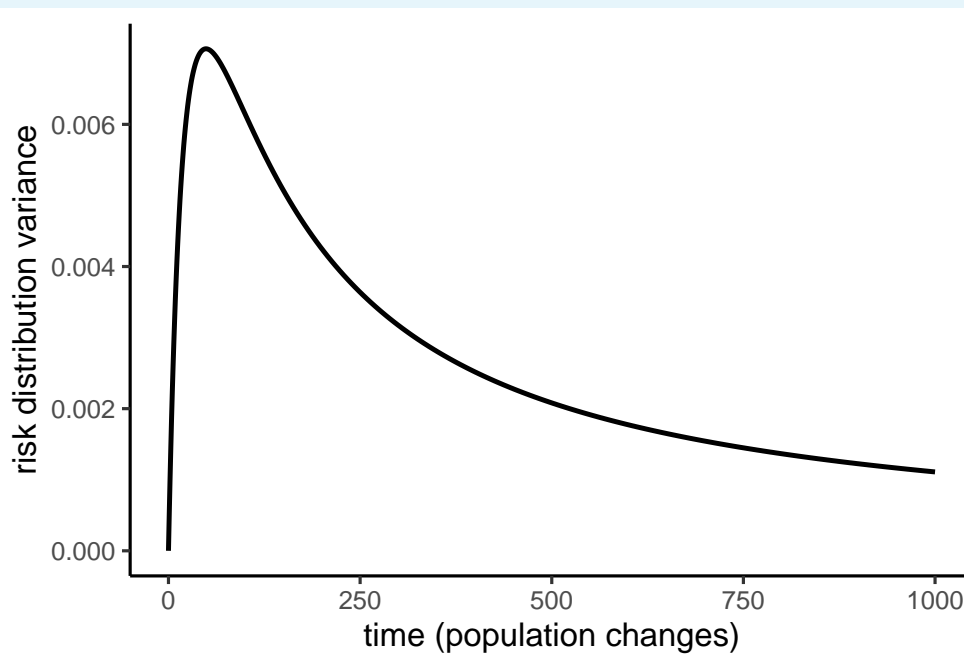

496  
497  
498  
499  
500

**Appendix 1—figure 3.** Dynamics of the variance of the probability density function over risk distributions for a growing epidemic with two subpopulations. It initially increases because we initialize the population at a specific risk distribution (delta distribution) and it eventually decreases as the risk distribution drifts less for larger populations.

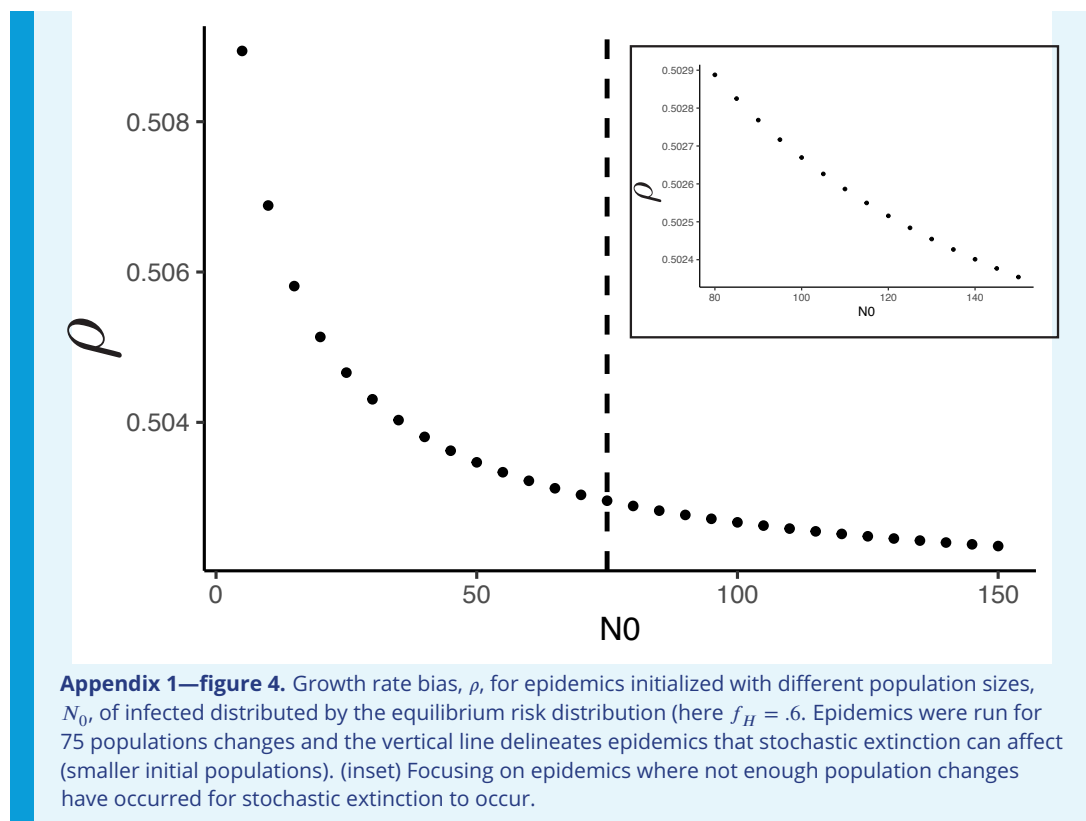

Source: https://medrxiv.org/content/10.1101/2022.11.15.22282366v3.full.pdf
